# Supplementary material for: Spatially controllable plasmon enhanced water splitting photocurrent in Au/TiO2–Fe2O3cocatalyst system
Source: Royal Society of Chemistry journal article supplement (doi:10.1039/c4ra05143b), 2014-09-03
Supplement: c4ra05143b1.pdf [file c4ra05143b1.pdf]

# Spatially Controllable Plasmon Enhanced Water Splitting Photocurrent in Au/TiO<sub>2</sub>- Fe<sub>2</sub>O<sub>3</sub> Cocatalyst System

**Wei-Hsuan Hung<sup>1\*</sup>, Tzu-Ming Chien<sup>1</sup>, An-Ya Lo<sup>2</sup>, Chuan-Ming Tseng<sup>3</sup>, Dongdong Li<sup>4</sup>**

<sup>1</sup>Feng Chia University, Taichung 407, Taiwan

<sup>2</sup>Department of Chemical and Materials Engineering, National Chin-Yi  
University of Technology

<sup>3</sup>Institute of Physics, Academia Sinica, Taipei 11529, Taiwan

<sup>4</sup>Shanghai Advanced Research Institute, Chinese Academy of Sciences,  
Shanghai 201210, China

## Supporting Materials

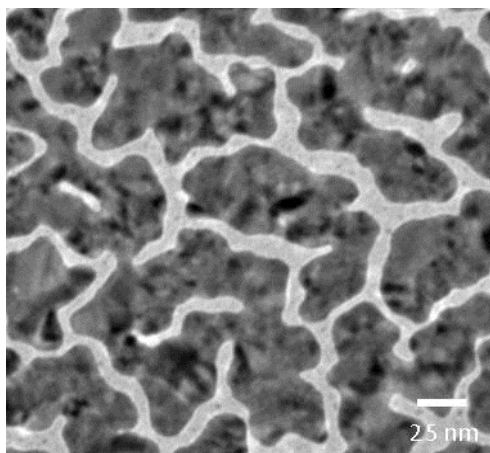

**Figure S1.** TEM image of island-like Au nanoparticles

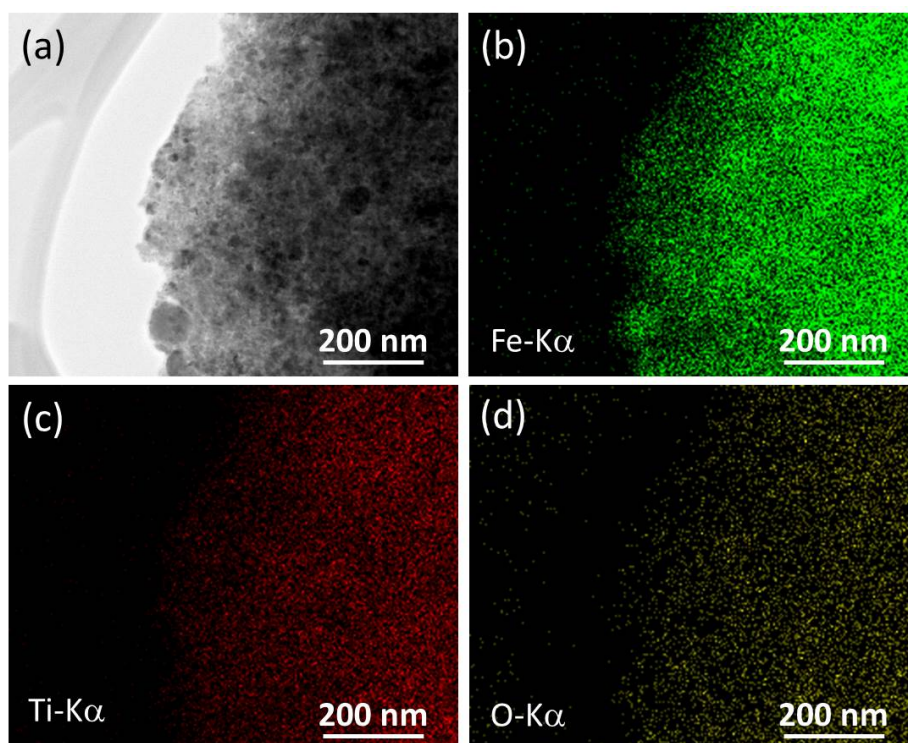

**Figure S2.** (a) Bright-field STEM image of TiO<sub>2</sub> and Fe<sub>2</sub>O<sub>3</sub> mixture. Elemental mapping images show the chemical distributions of (b) Iron (Fe-K $\alpha$ ), (c) Titanium (Ti-K $\alpha$ ) and (d) Oxygen (O-K $\alpha$ ).

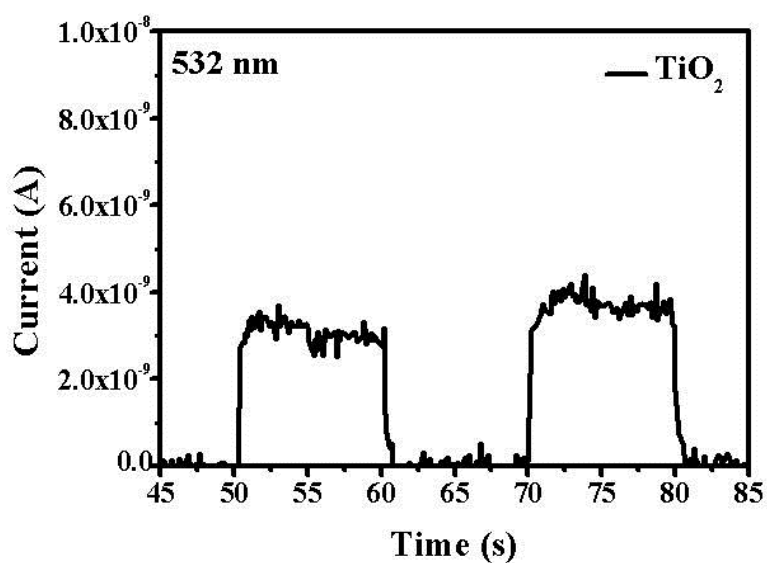

**Figure S3.** (a) The photocurrent response of  $\text{TiO}_2$  only photoelectrode under 532 nm (600 mW)

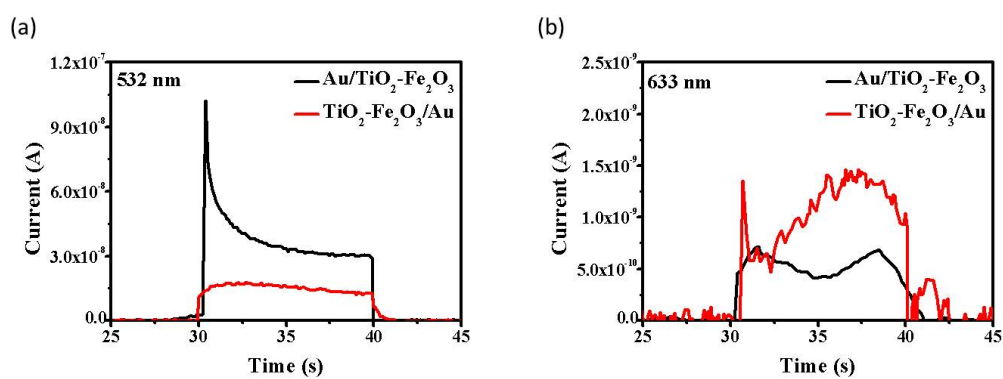

**Figure S4.** (a) The photocurrent response of  $\text{Au/TiO}_2\text{-Fe}_2\text{O}_3$  and  $\text{TiO}_2\text{-Fe}_2\text{O}_3/\text{Au}$  under 532 nm (600 mW) (b) and under 633 nm (10 mW) laser irradiation.

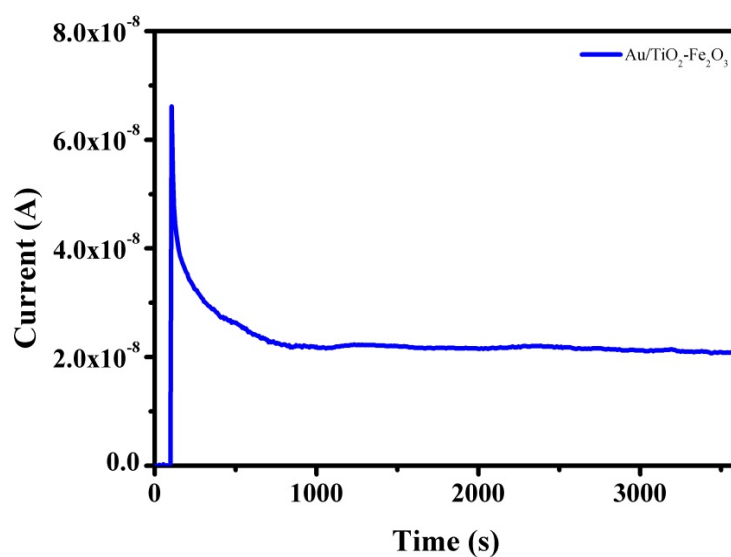

**Figure S5.** Prolonged Photocurrent measurement of Au/TiO<sub>2</sub>-Fe<sub>2</sub>O<sub>3</sub> photoelectrode under 532 nm laser irradiation

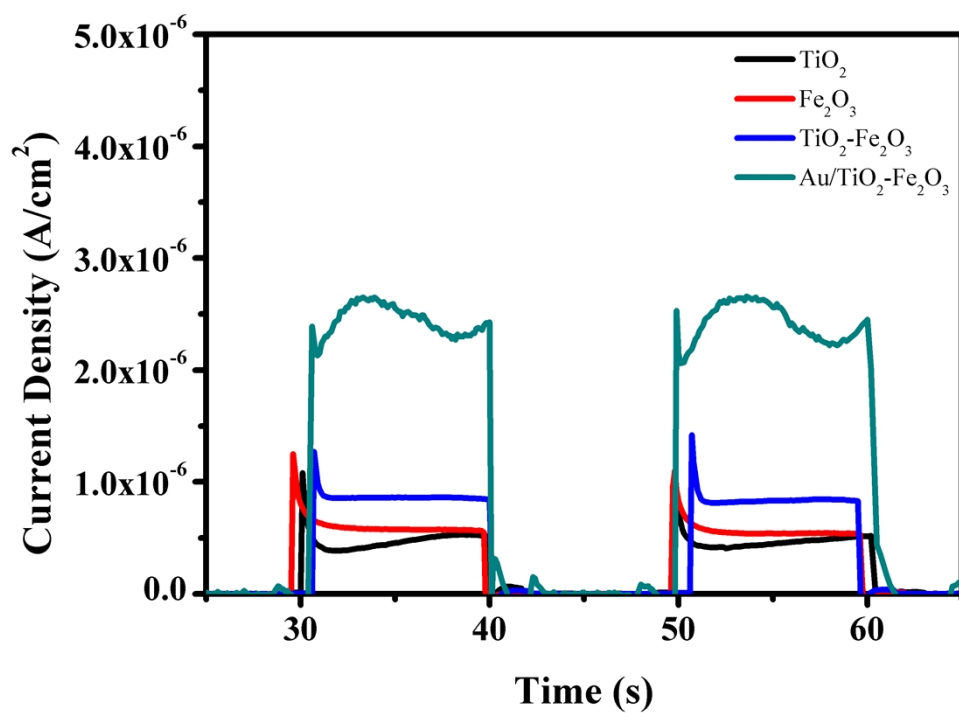

**Figure S6.** The photocurrent response of different photoelectrodes under simulated sunlight
